## Erratum

**Developmental stage determines the effects of MYC in the mammary epithelium**

Collin M. Blakely, Louis Sintasath, Celina M. D'Cruz, Kristina T. Hahn, Katherine D. Dugan, George K. Belka and Lewis A. Chodosh *Development* **132**, 1147-1160.

The e-press version of the article that was published on the 2nd February contains several errors.

Both the published print and final online versions of this article are correct.

We apologise to the authors and readers for this mistake.
